# Supplementary material for: N-myc Downstream Regulated Gene 1/Cap43 Suppresses Tumor Growth and Angiogenesis of Pancreatic Cancer through Attenuation of Inhibitor of κB Kinase β Expression
Source: Oxford University Press journal article supplement (doi:10.1158/0008-5472.can-08-4882), 2009-06-02
Supplement: 00085472can084882-sup-stab_3.pdf [file 00085472can084882-sup-stab_3.pdf]

**Supplementary Table 3. Association between NDRG1/Cap43 expression and clinicopathologic variables in 37 patients with pancreatic ductal adenocarcinoma**

| Variable                     | Number of patients | NDRG1/Cap43 expression |                      | P*                         |
|------------------------------|--------------------|------------------------|----------------------|----------------------------|
|                              |                    | Positive<br>(n = 18)   | Negative<br>(n = 19) |                            |
| <b>Age (y)</b>               |                    |                        |                      | <b>0.57</b>                |
| <65                          | 19                 | 9                      | 10                   |                            |
| ≥65                          | 18                 | 9                      | 9                    |                            |
| <b>Gender</b>                |                    |                        |                      | <b>0.070</b>               |
| Male                         | 22                 | 8                      | 14                   |                            |
| Female                       | 15                 | 10                     | 5                    |                            |
| <b>Depth of invasion</b>     |                    |                        |                      | <b>0.00019<sup>†</sup></b> |
| T1, T2                       | 19                 | 15                     | 4                    |                            |
| T3, T4                       | 18                 | 3                      | 15                   |                            |
| <b>Lymph node metastasis</b> |                    |                        |                      | <b>0.57</b>                |
| Negative                     | 19                 | 9                      | 10                   |                            |
| Positive                     | 18                 | 9                      | 9                    |                            |
| <b>Pathologic stage</b>      |                    |                        |                      | <b>0.56</b>                |
| I, II                        | 17                 | 8                      | 9                    |                            |
| III, IV                      | 20                 | 10                     | 10                   |                            |

\*Analyses were carried out using Fisher's exact test.

<sup>†</sup> $P < 0.05$  considered statistically different.
